# Supplementary material for: Photoactivated linkage isomerism in single crystals of nickel, palladium and platinum di-nitro complexes – a photocrystallographic investigation
Source: Royal Society of Chemistry journal article supplement (doi:10.1039/c2dt30314k), 2012-01-01
Supplement: c2dt30314k.pdf [file c2dt30314k.pdf]

## Supplementary Information

# Photoactivated Linkage Isomerism in Single Crystals of Nickel, Palladium and Platinum Di-nitro Complexes – A Photocrystallographic Investigation

Mark R. Warren, Simon K. Brayshaw, Lauren E. Hatcher, Andrew L. Johnson, Stefanie Schiffers, Anna J. Warren, Simon, J. Teat, John E. Warren, Christopher H. Woodall and Paul R. Raithby

|                                                                          |            |
|--------------------------------------------------------------------------|------------|
| Crystal Explorer Plots for Complexes <b>1-3</b>                          | Pages 2-6  |
| UV/visible solution spectra for complexes <b>1-4</b> at room temperature | Pages 7-10 |

## CrystalExplorer fingerprint plots

2D Fingerprint plots generated in the program CrystalExplorer<sup>38</sup>, give a summary of the unique set of intermolecular interactions in the crystal structure and allowing comparison of the crystal packing between ground and photoactivated states.

( $d_e$  = distance from molecular surface to atom external atom,  $d_i$  = distance from molecular surface to internal atom)

### Complex 1

The key intermolecular interactions in **1** involve only H...H or O...H close-contacts. O...H interactions relate to changes induced by the isomerisation as oxygen is only present in nitrite group for this complex. H...H interactions represent changes in rest of structure.

Changes in the Fingerprint plot are the result of O...H interactions; the O...H hydrogen bond “spikes” move closer to the diagonal and to a lower  $d_e/d_i$  value, showing that the hydrogen bonds shorten as a result of the isomerisation. Changes in O...H contacts are a direct result of the change in coordination mode of this ligand in 25 % of structure **1#O**.

The shape of portion of Fingerprint plot created by H...H contacts remains largely unchanged on going from GS to ES, supporting observations that the overall crystal packing is unchanged following photoactivation, excepting the isomerisation.

**1 (GS)**

**1#O (ES)**

### All interactions

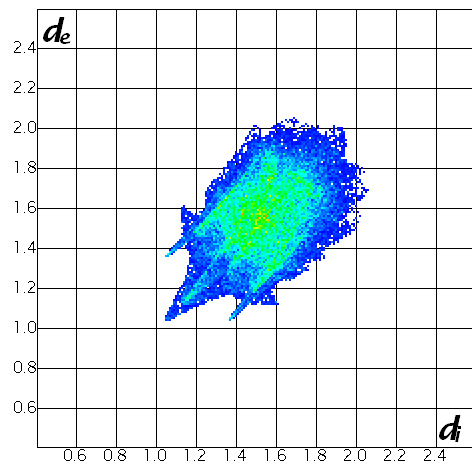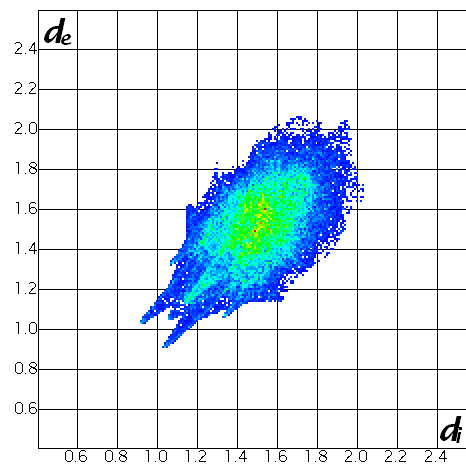

### H...H

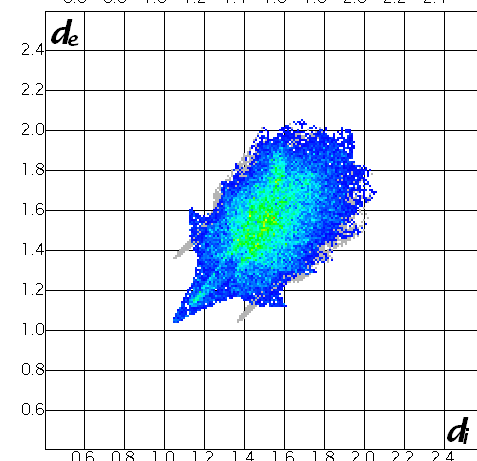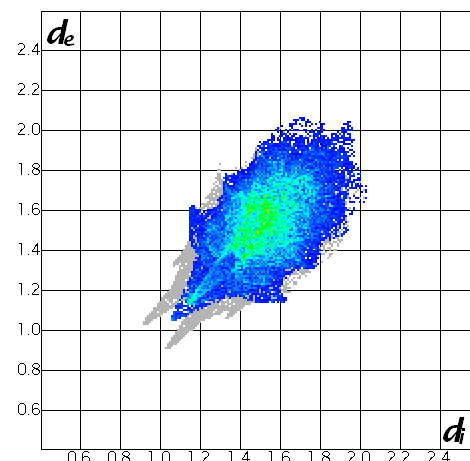

## O...H

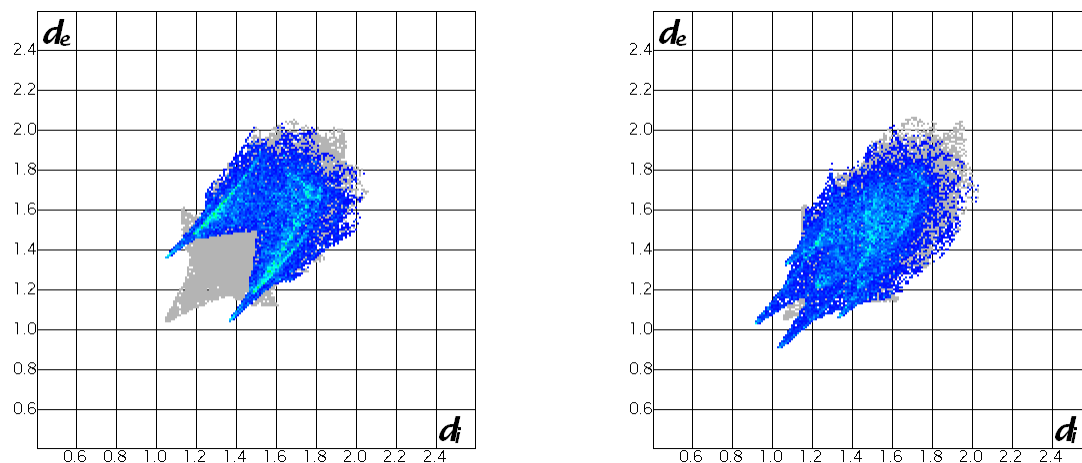

## Complex 2

The key intermolecular interactions in **2** consist only of C...H interactions (corresponding to changes in the whole structure) and O...H and N...H close-contacts (which can only correspond to changes involving the isomerisation, as nitrogen and oxygen atoms are only present in the nitrite ligand).

C...H and H...H plots are same shape on going from GS to ES, confirming the crystal packing is largely unchanged following photoactivation.

The portion of the plots corresponding to O...H contacts show O-H hydrogen bond “spikes” change position and become sharper, indicating a slight shortening of these interactions due to the isomerisation.

While no N...H close contacts are observed in **2**, a new N...H “spike” is observed in the **2#O** plot, corresponding to the formation of a new N-H interaction when N1 moves position to N1A in the metastable nitrito arrangement.

**2(GS)**

**2#O (ES)**

## All interactions

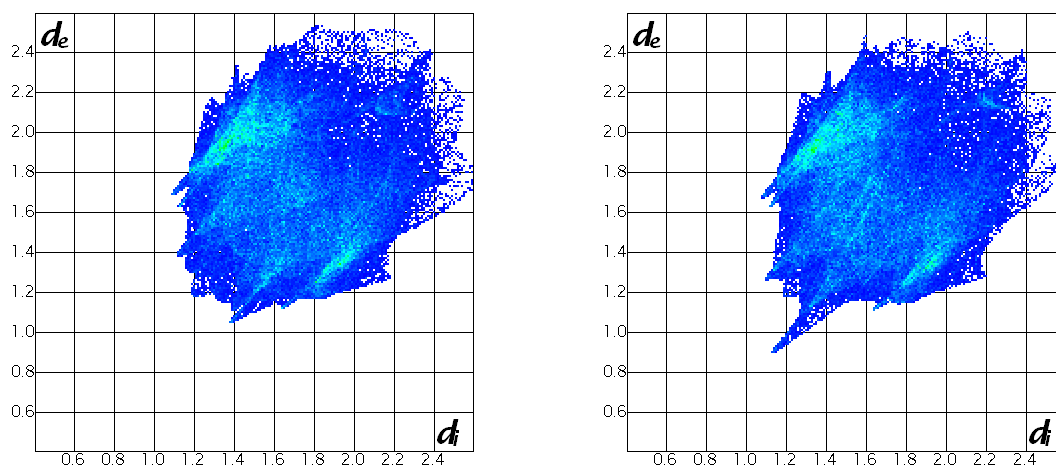

### C...H

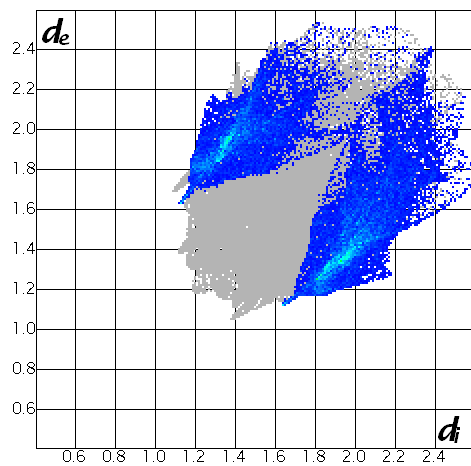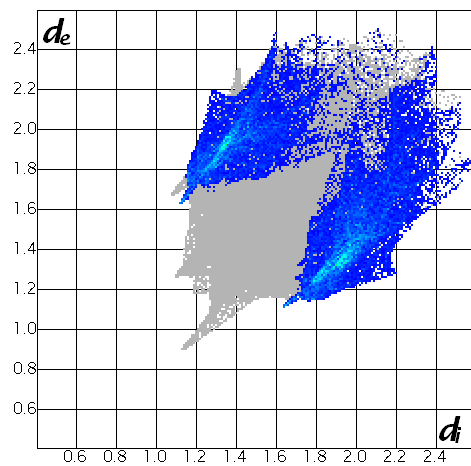

### H...H

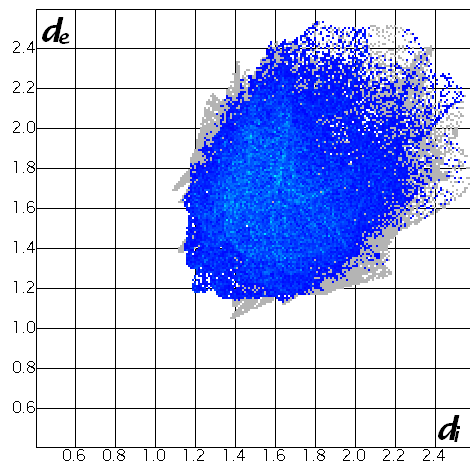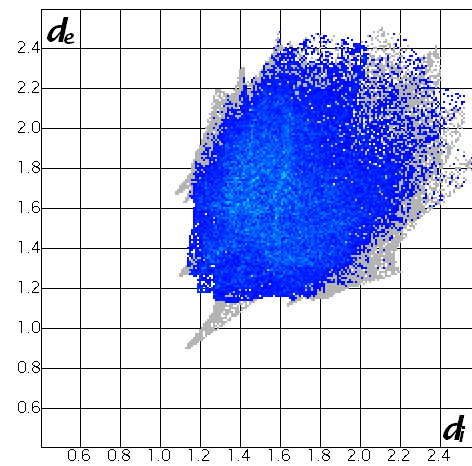

### O...H

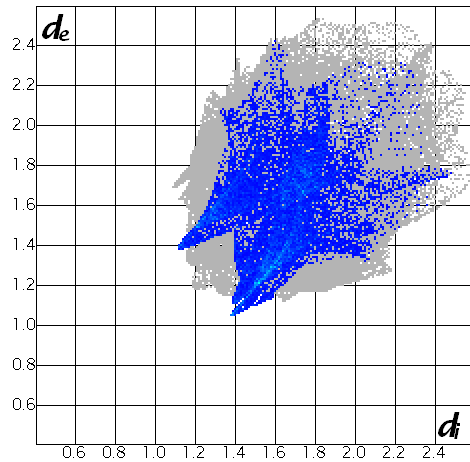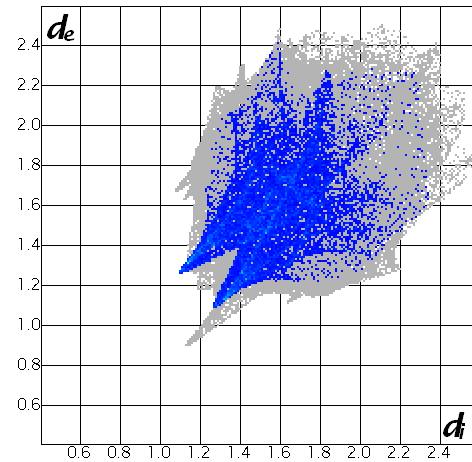

## N...H

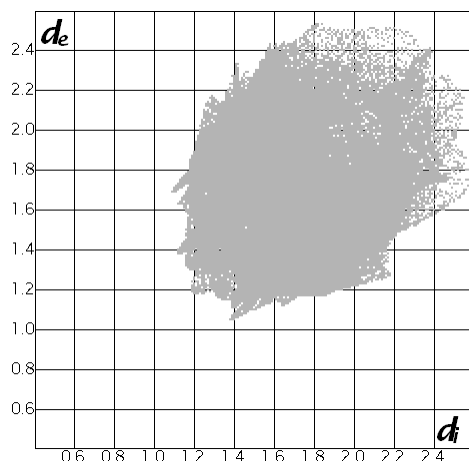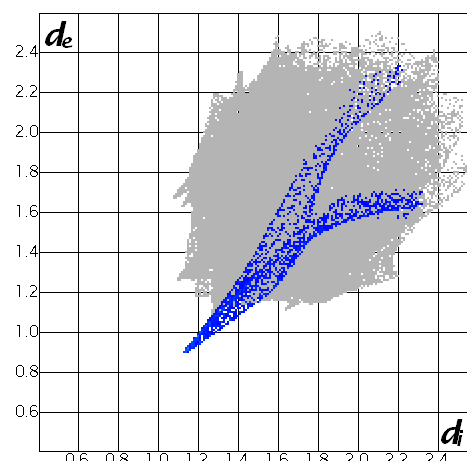

## Complex 3

The key intermolecular interactions in **3** involve only C...H and H...H close contacts (relating to changes in the whole structure) and O...H close contacts (only related to the isomerising nitrite ligand).

The shape of section of Fingerprint plots relating to C...H and H...H interactions are the same for **3** and **3#O**, supporting the observation that the crystal packing is unchanged excepting the isomerisation.

The only changes between the plots relate to changes in O...H interactions with hydrogen bond “spikes” moving to a lower  $d_e/d_i$  value, showing that O...H hydrogen bonds become shorter on photoexcitation.

### 3(GS)

### 3#O (ES)

## All interactions

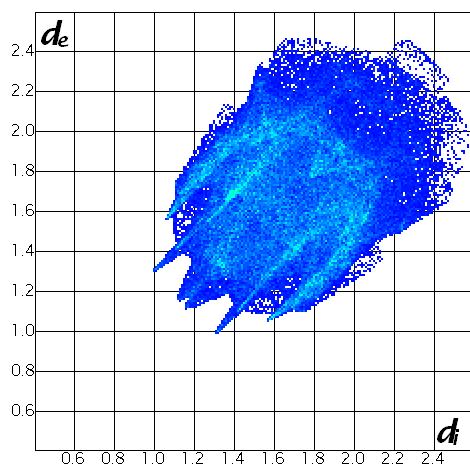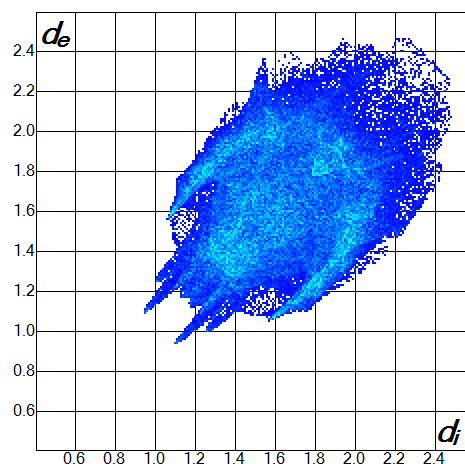

### C...H

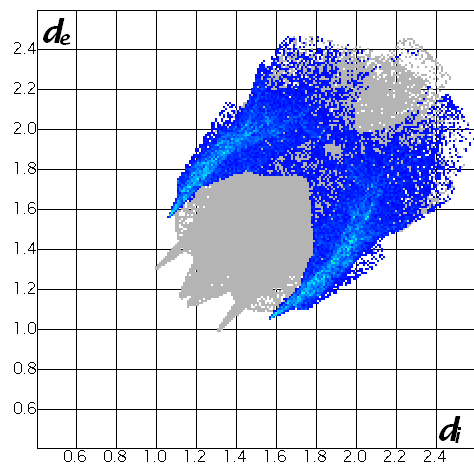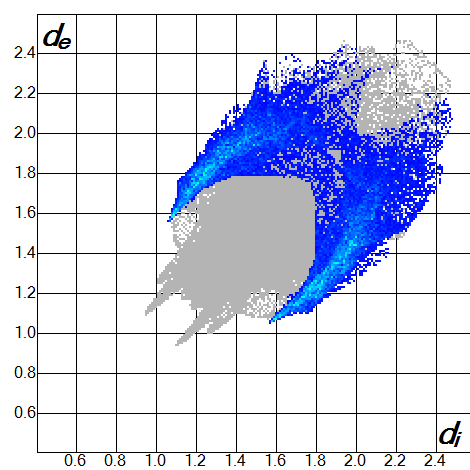

### H...H

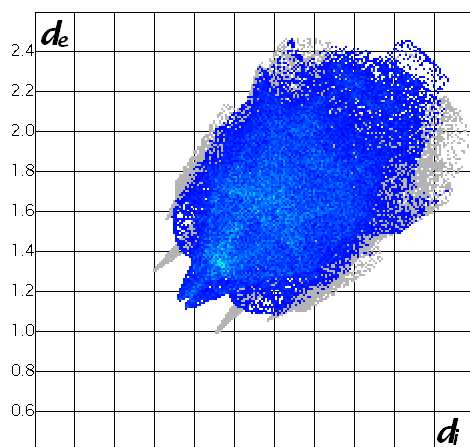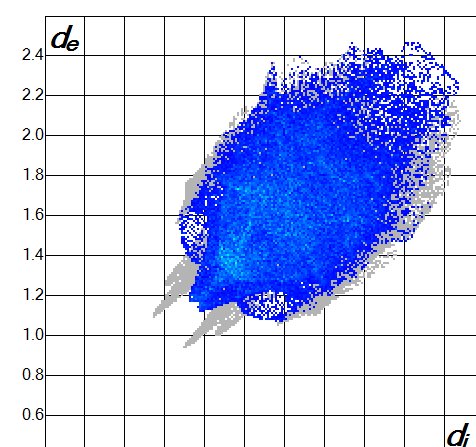

### O...H

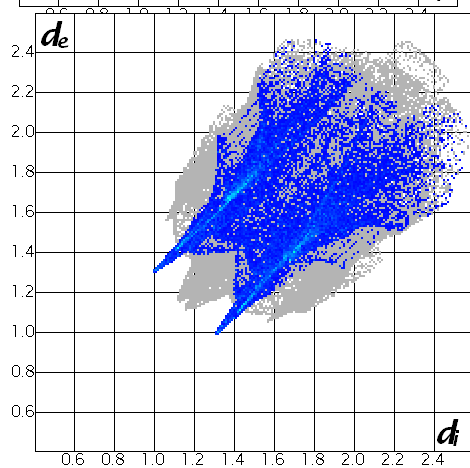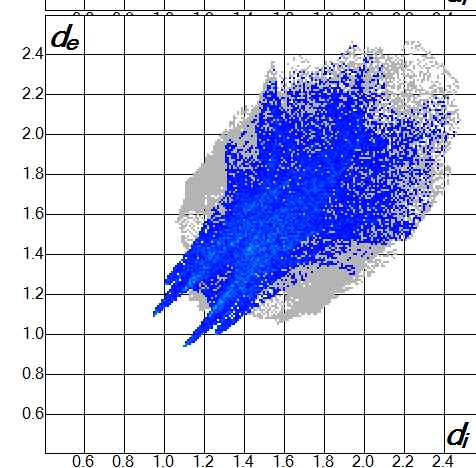

## UV/vis Spectra and Calculated Electronic Transitions

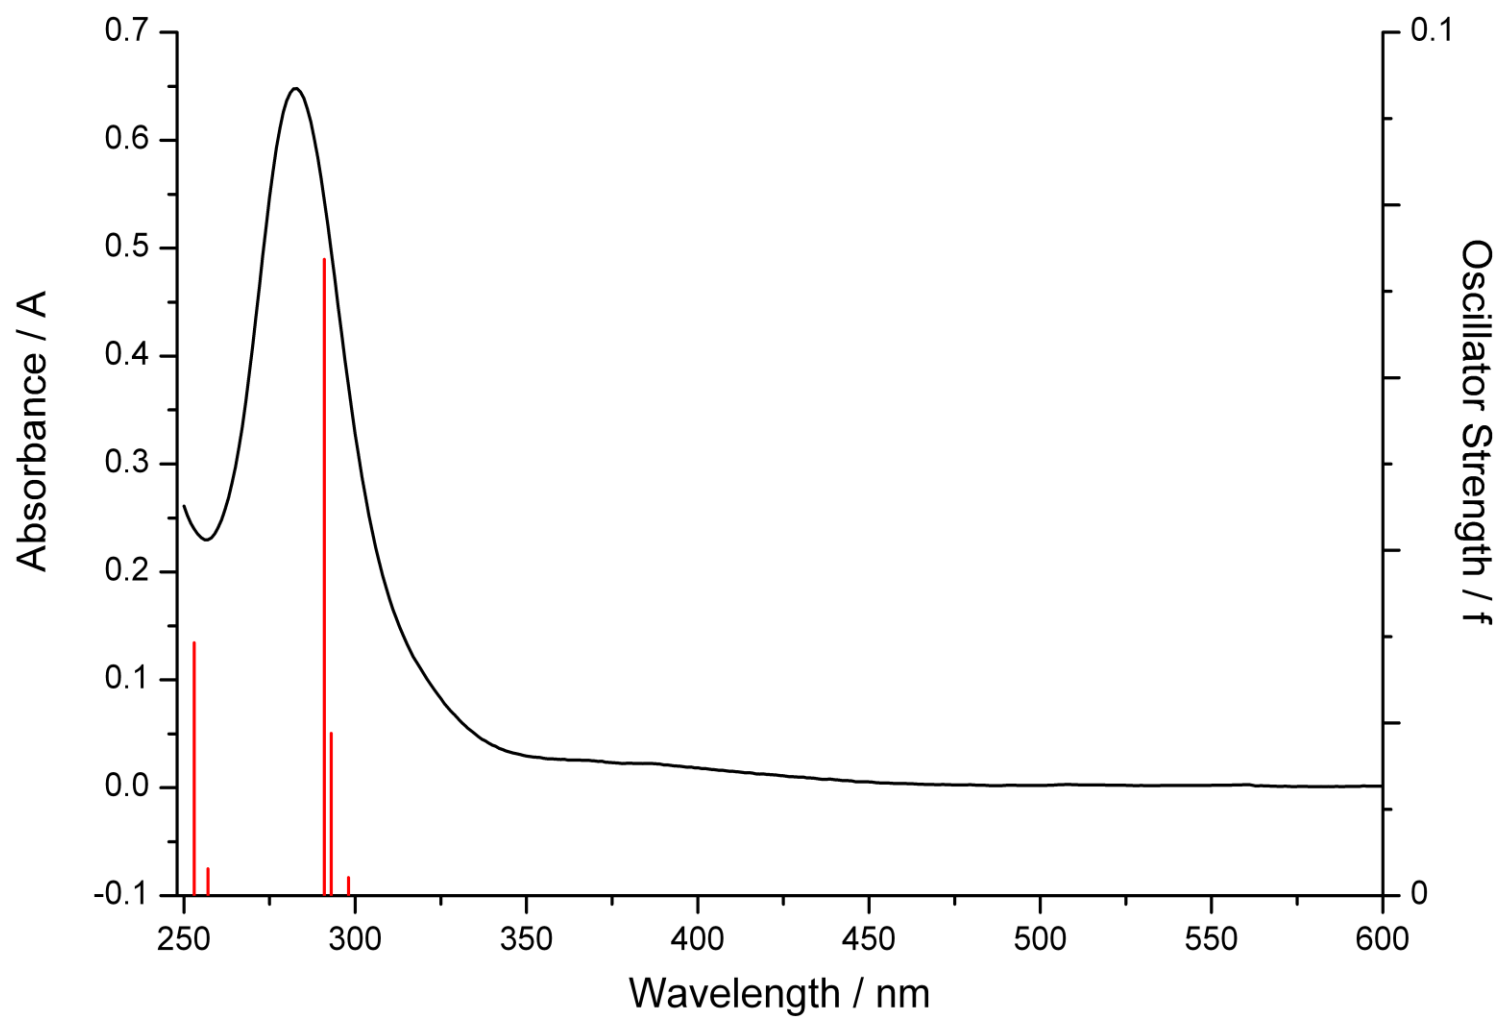

**Spectrum 1:** Solution UV/vis spectrum of **1** ( $1 \times 10^{-4}$ M solution) and expected electronic transitions from TD-DFT calculations

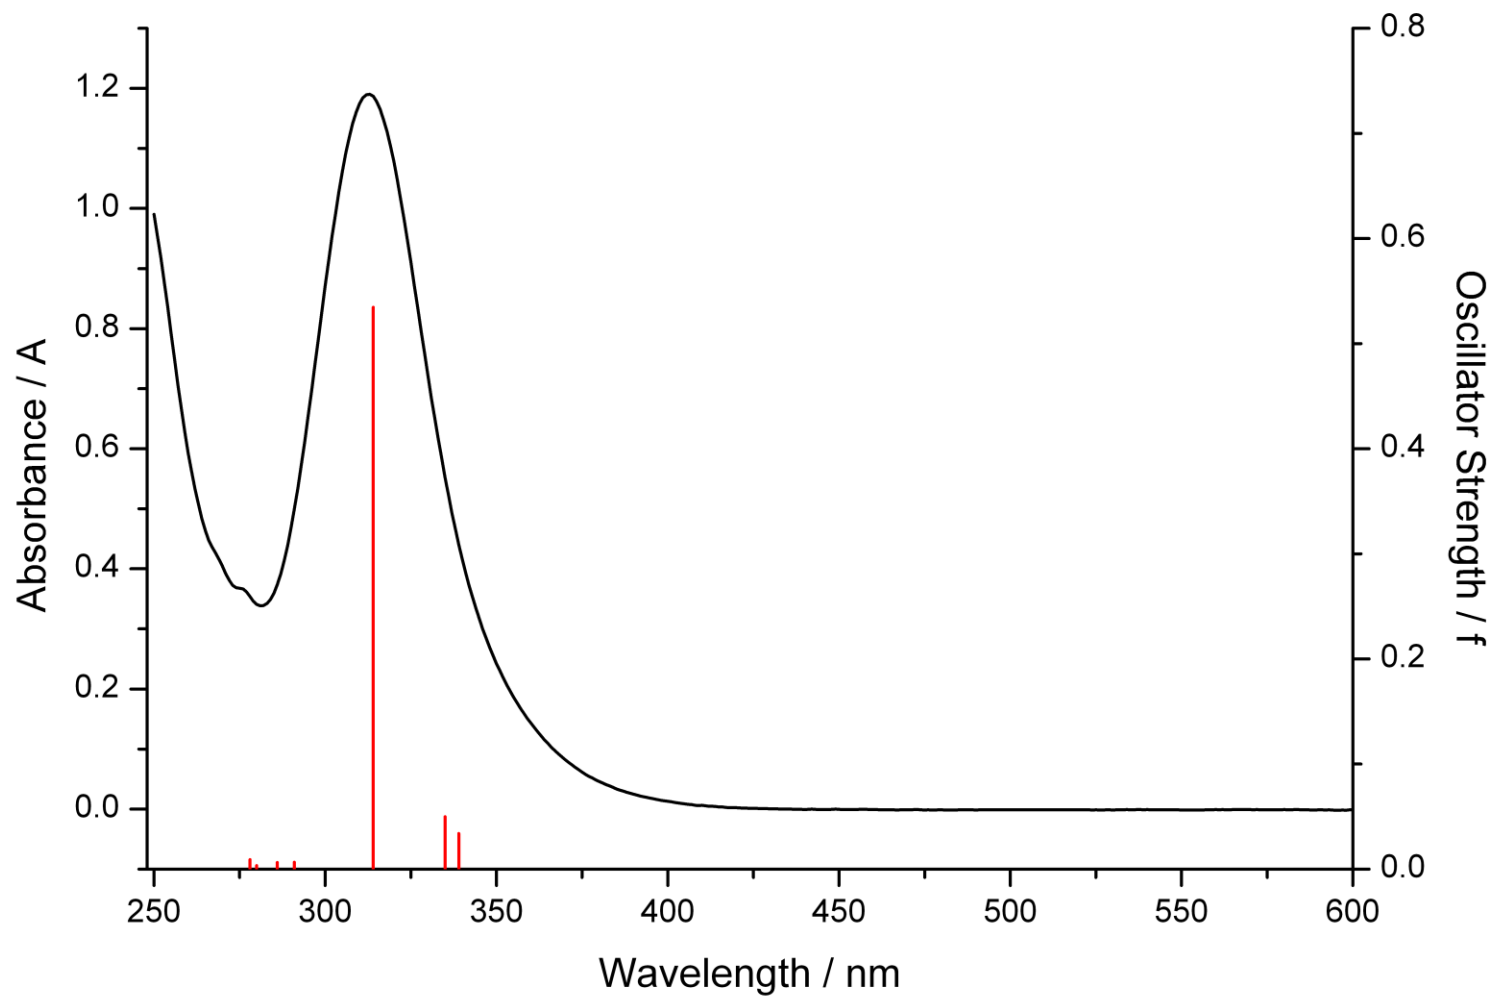

**Spectrum 2:** Solution UV/vis spectrum of **2** ( $1 \times 10^{-4}$  M solution) and expected electronic transitions from TD-DFT calculations



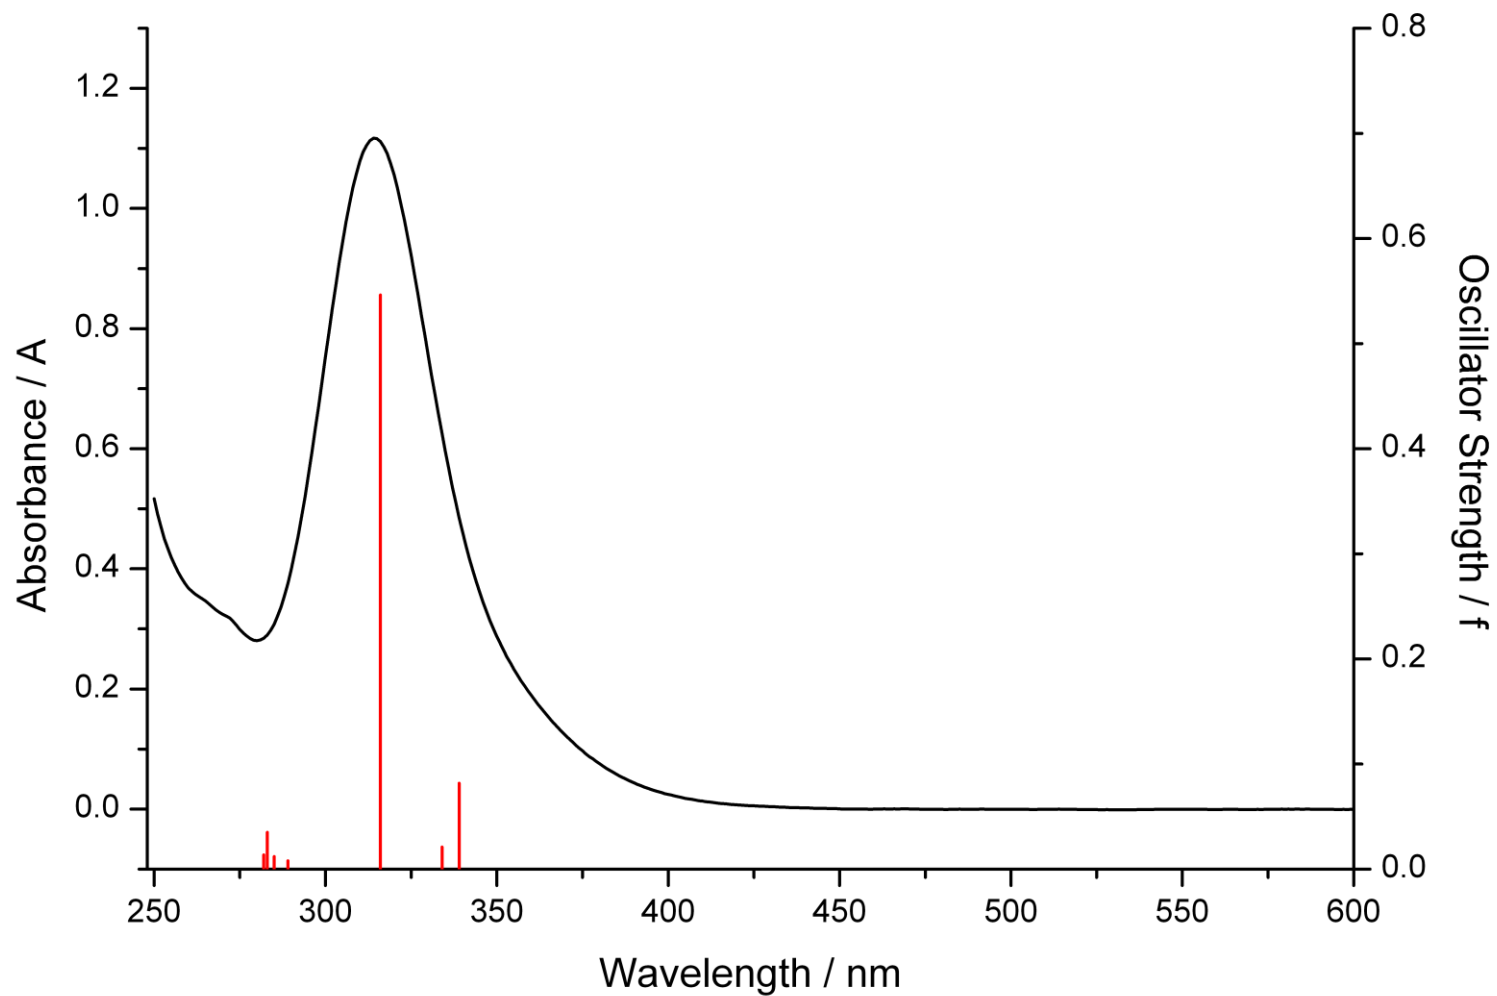

**Spectrum 3:** Solution UV/vis spectrum of **3** (1 x 10<sup>-4</sup>M solution) and expected electronic transitions from TD-DFT calculations

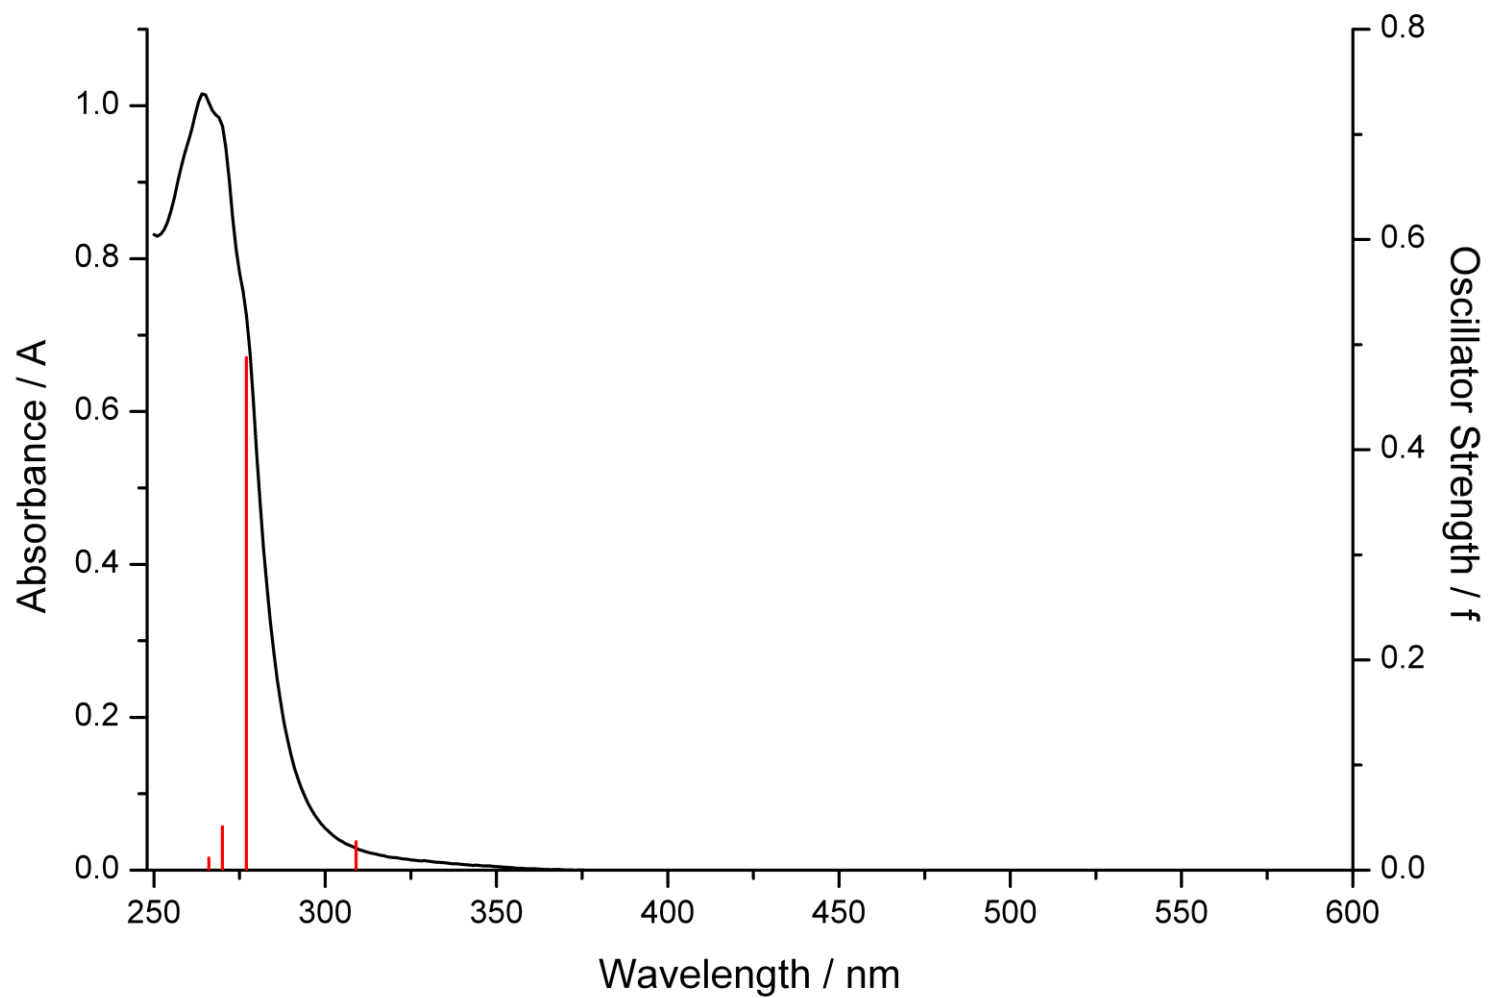

**Spectrum 4:** Solution UV/vis spectrum of **4** ( $1 \times 10^{-4}$  M solution) and expected electronic transitions from TD-DFT calculations

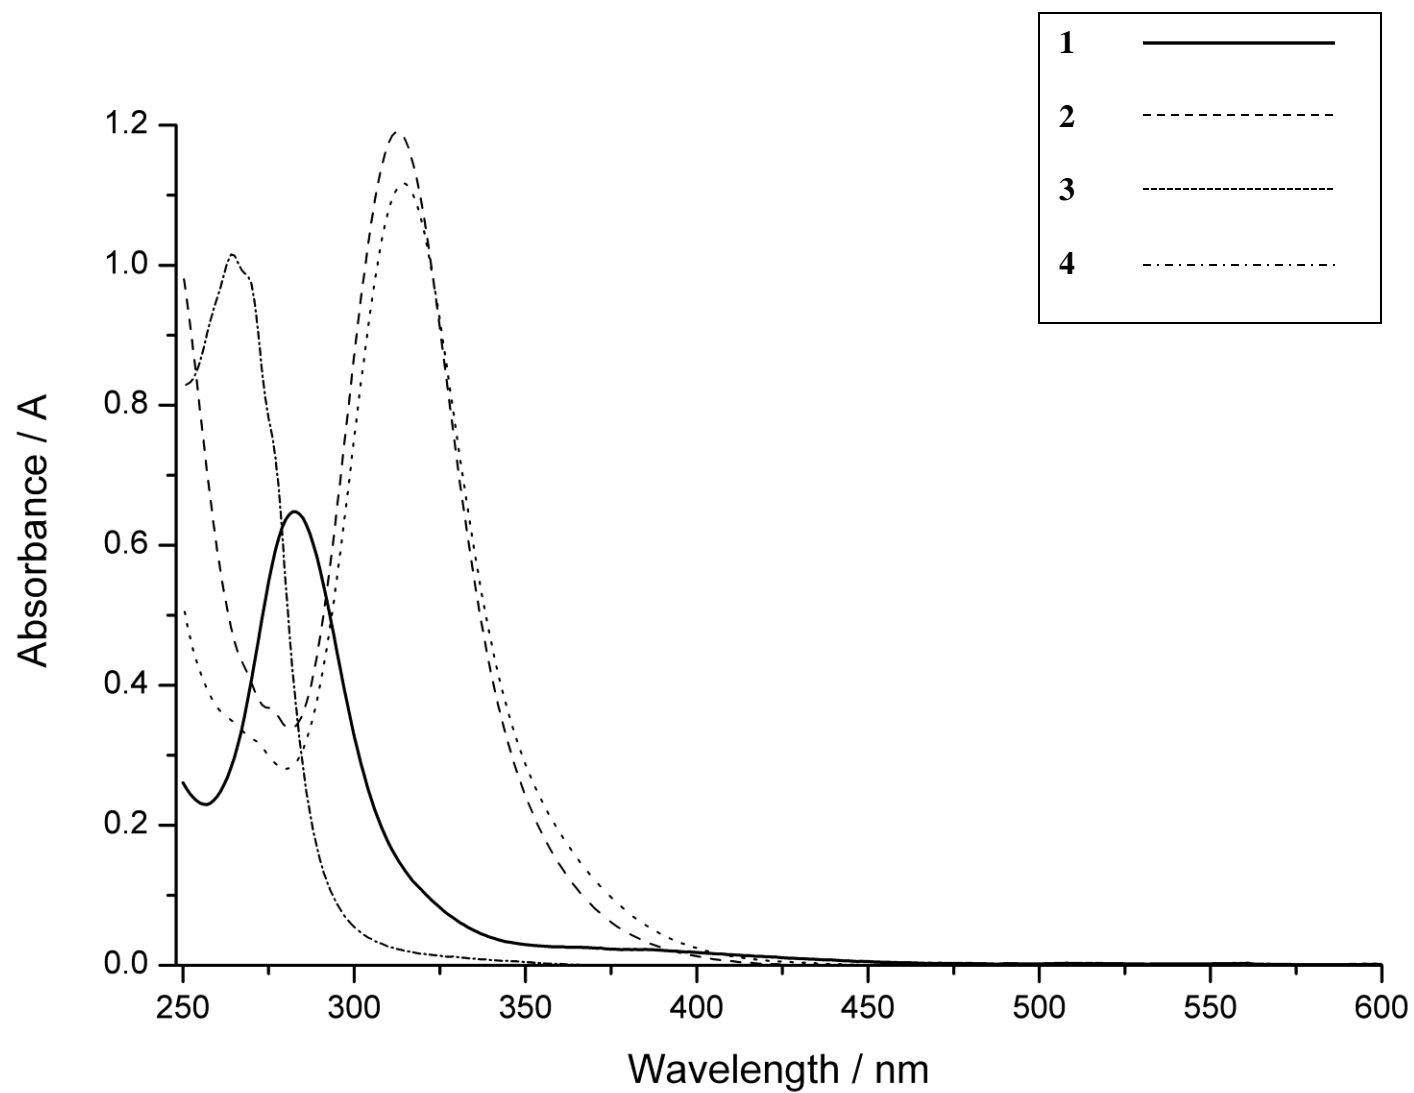

**Spectrum 5:** Overlay of UV/vis spectra for complexes **1** to **4**
